# Supplementary material
Source: PubMed Central journal article supplement (PMC3567859)

**Supplementary Figure 1. LAMP-1 Expression in Fallopian Tissue.** LAMP-1 expression in normal fallopian tissue (A-B) and in serous papillary fallopian adenocarcinoma tissue (E-F). An adjacent section of normal (C-D) and serous adenocarcinoma (G-H) was stained with hematoxylin and eosin (H&E) to denote epithelial cells. LAMP-1 is expressed within the epithelial cells of fallopian fimbriae in serous adenocarcinoma.

**Supplementary Figure 1**

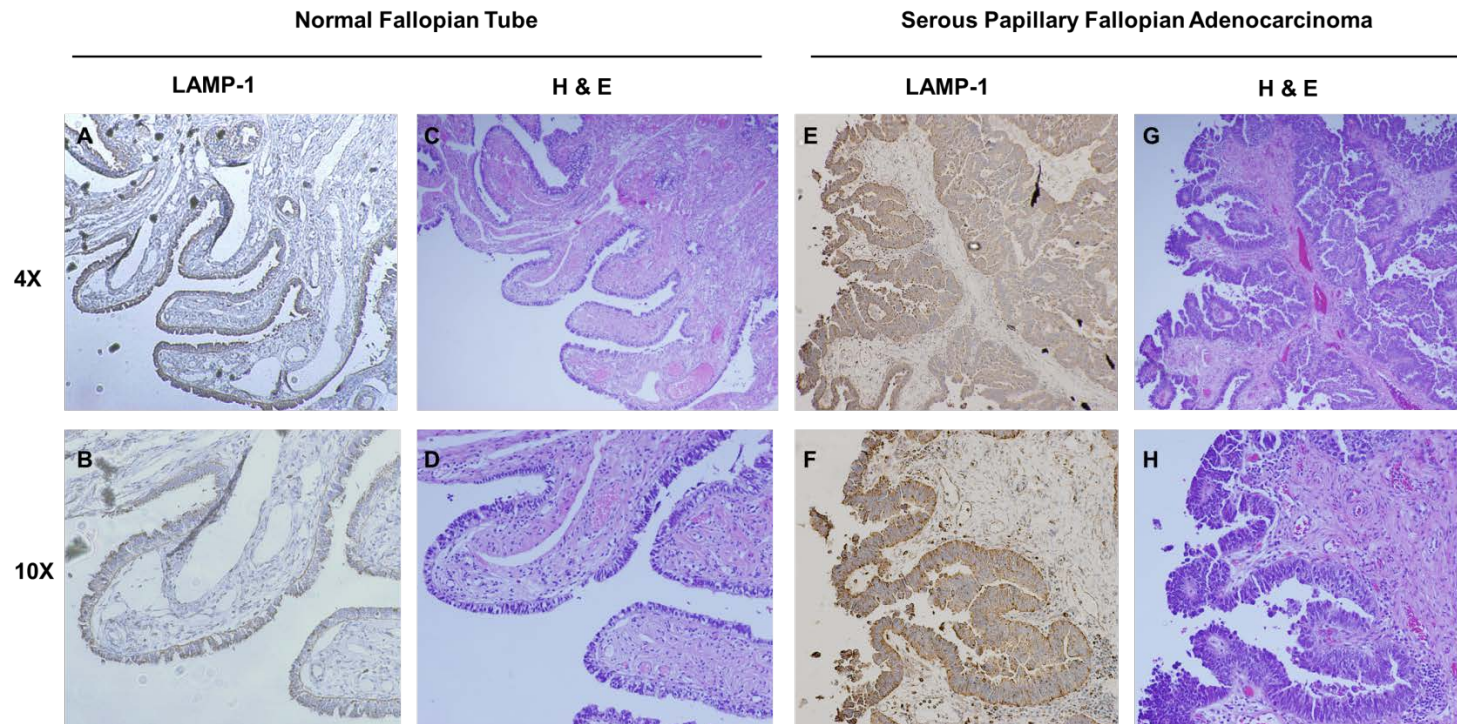

Supplement: supp_M112.019521_mcp.M112.019521-1.pdf [file supp_M112.019521_mcp.M112.019521-1.pdf]
