# Supplementary material
Source: PubMed Central journal article supplement (PMC3567859)
Supplement: supp_M112.019521_mcp.M112.019521-3.pdf [file supp_M112.019521_mcp.M112.019521-3.pdf]

Supplementary Table 1. Proteins identified 12 h post-treatment. Compound-treated cellular lysates (114, 115, 116) normalized to vehicle-treated cell lysates (113); compound-treated conditioned media (118, 119, 121) normalized to vehicle-treated conditioned media (117).

Supplementary Table 2. Proteins identified 24 h post-treatment. Compound-treated cellular lysates (114, 115, 116) normalized to vehicle-treated cell lysates (113); compound-treated conditioned media (118, 119, 121) normalized to vehicle-treated conditioned media (117).

Supplementary Table 3. Proteins identified 48 h post-treatment. Compound-treated cellular lysates (114, 115, 116) normalized to vehicle-treated cell lysates (113); compound-treated conditioned media (118, 119, 121) normalized to vehicle-treated conditioned media (117).

Supplementary Table 4. Proteins identified with significant changes 12 h post-EGF exposure and their expression levels following LY294002 or EGF and LY294002 exposure.

Supplementary Table 5. Proteins identified with significant changes 24 h post-EGF exposure and their expression levels following LY294002 or EGF and LY294002 exposure.

Supplementary Table 6. Proteins identified with significant changes 48 h post-EGF exposure and their expression levels following LY294002 or EGF and LY294002 exposure.

Supplementary Table 7. Full pathway analysis of EGF-regulated proteins at three time points. p-value < 0.01.

Supplementary Table 8: 100 ovarian cores scored for LAMP-1, EGFR and aconitase 2 expression. Scoring based on protein expression. Gender, age organ and diagnosis defined. TNM= tumor, node, metastasis classification system. 0 = no staining; 1 = weak staining, 2 = moderate staining, and 3 = strong staining.
